# Supplementary material for: Relationship between tropical leaf phenology and ecosystem productivity using phenocameras
Source: Frontiers journal article supplement (doi:10.3389/fenvs.2023.1223219), 2023-09-14
Supplement: Data_Sheet_1.docx [file Data_Sheet_1.docx]

Supplementary Material

Evaluating the relationship between tropical leaf phenology and ecosystem productivity using phenocameras.

Bruna Alberton1,2*, Thomas C. M. Martin3, Humberto R. da Rocha3, Andrew D. Richardson4, Magna S. B. de Moura5, Ricardo da S. Torres6,7, Leonor Patricia Cerdeira Morellato1

*** Correspondence:** Corresponding Author: bru.alberton@gmail.com


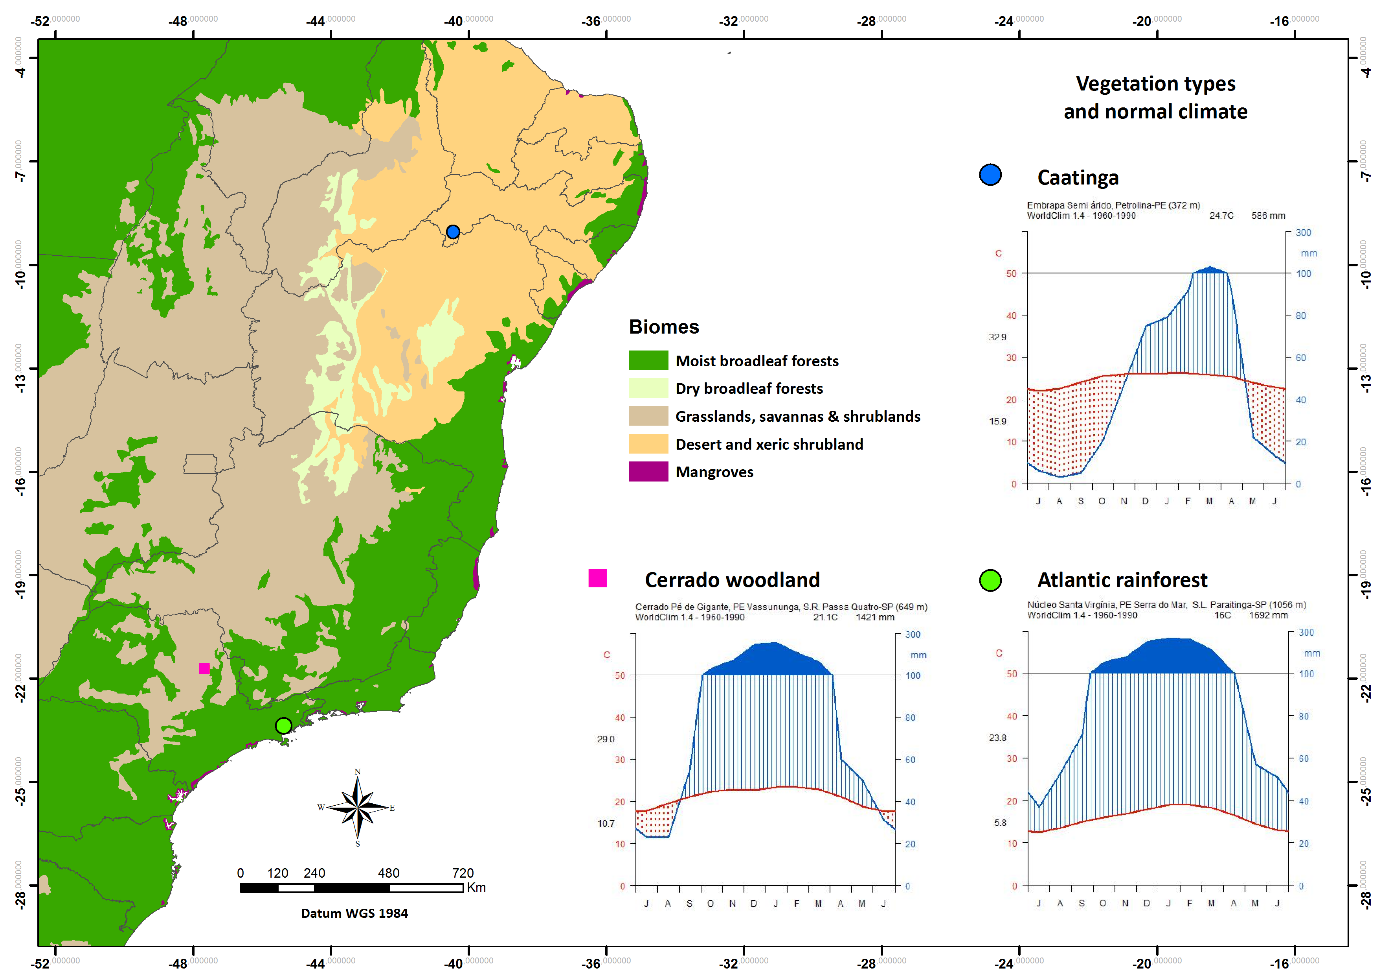


**Supplementary Figure 1.** Map showing the location of the study sites and flux towers with its respective Walter Climate Diagram. Blue circle: caatinga; Pink square: cerrado; Green circle: rainforest.
